# Supplementary material
Source: publisher site journal article supplement (https://www.spandidos-publications.com/7078/downloadSupplementary)
Supplement: Supplementary file 1 [file downloadSupplementary]

## Sheet: Analysis_data
Table SII. Patient survival data and gene expression analysis in colorectal cancer risk model.
Sample	Times	Status	RPS17	CCNB1	KPNA2	TRAP1	C8G	LGALS4	LGALS2	CA4	SLC6A8	Risk	Risk score
TCGA-A6-6780-01	1.67671	0	3.23884	7.47632	6.50513	5.99254	3.85352	10.4581	1.85424	0.2529	4.882	High_risk	-1.37495
TCGA-CM-5868-01	1.41918	0	2.15701	7.38028	6.12548	6.22303	2.0675	10.4999	3.22534	2.00641	3.4876	Low_risk	-1.67578
TCGA-CM-6165-01	1.33699	0	1.57075	6.42735	5.52451	5.67332	2.32602	11.0654	4.5876	1.67861	6.39669	Low_risk	-1.71142
TCGA-AA-3956-01	2.83562	0	2.90165	6.2243	5.66575	5.70221	3.44098	11.0109	4.3766	6.65795	5.9121	High_risk	-1.46889
TCGA-AA-3527-01	0	0	2.75268	6.3062	4.96111	7.82532	2.21903	11.4596	6.47356	1.01507	7.87469	Low_risk	-1.63402
TCGA-CA-6716-01	1.01644	0	2.59991	6.68474	5.49818	5.7668	1.83669	10.5769	1.08624	0.0457225	3.8884	High_risk	-1.54513
TCGA-D5-6930-01	1.11233	0	2.327	7.13336	5.8626	5.89389	2.09576	9.90351	2.59815	0.148999	5.95335	High_risk	-1.52805
TCGA-AY-A8YK-01	1.56986	0	2.28217	6.44233	6.18864	6.49808	2.40302	10.694	4.08807	6.484	6.07929	Low_risk	-1.63988
TCGA-CM-6164-01	2.41918	0	2.60386	6.3938	6.08991	6.00674	1.21269	10.6924	2.45415	0.937721	4.86242	Low_risk	-1.64345
TCGA-D5-6530-01	1.70137	0	2.35944	6.60615	5.66977	5.89672	2.89753	10.6247	4.03305	1.54458	5.78586	High_risk	-1.52504
TCGA-G4-6323-01	1.14795	0	2.48638	5.61868	5.13683	5.03827	1.8792	10.9437	5.45971	0	5.12626	Low_risk	-1.55005
TCGA-NH-A50V-01	1.61096	0	2.4485	6.18085	5.35187	5.5092	1.32187	9.37267	2.18472	0.0650208	5.28109	High_risk	-1.42928
TCGA-A6-5661-01	2.79452	0	2.11728	6.70482	5.98535	5.50708	0.606869	10.4088	5.72731	4.46333	5.85828	Low_risk	-1.77853
TCGA-A6-4107-01	2.70411	0	2.60343	7.16017	4.84043	5.59961	2.23778	10.5906	5.10212	0.119555	6.56399	High_risk	-1.54064
TCGA-AY-4070-01	1.3589	1	3.51456	6.12686	5.63902	5.3969	1.55144	9.67851	4.72089	5.34386	5.51859	High_risk	-1.38084
TCGA-QL-A97D-01	1.82466	0	3.2109	7.10582	5.89805	6.07977	4.84277	10.0983	3.44866	0.0780633	6.28437	High_risk	-1.21069
TCGA-AA-3530-01	1.58904	0	3.90563	6.8792	5.53468	6.09564	0.612022	10.196	3.51268	0.462157	4.76866	High_risk	-1.48811
TCGA-A6-5666-01	2.72603	0	2.2862	7.70301	6.81848	6.48088	1.00259	10.8406	1.04803	0.15095	3.73181	Low_risk	-1.81774
TCGA-AA-3655-01	5.08493	0	2.76719	7.5731	6.53611	6.10722	2.60117	10.1431	2.96501	1.02489	7.17548	High_risk	-1.52505
TCGA-A6-5656-01	2.74247	0	3.80345	5.89998	4.90512	5.18795	2.09564	8.84894	3.11478	2.04074	4.52789	High_risk	-1.11219
TCGA-A6-6653-01	2.03288	0	1.36362	7.84004	6.86186	5.96705	3.69748	11.8587	6.47848	0.85989	9.20696	Low_risk	-1.86738
TCGA-DM-A0XD-01	2.03562	1	3.09075	6.69985	5.79183	5.70594	1.90654	10.1675	2.52414	0	7.36501	High_risk	-1.45014
TCGA-DM-A28K-01	8.1863	0	3.34877	6.95967	6.30138	5.9511	1.27053	11.7059	2.83092	0.0820213	6.22411	Low_risk	-1.71077
TCGA-A6-A565-01	1.35342	1	3.03638	5.81889	5.16982	4.33666	3.0941	11.2382	4.61913	6.87352	6.71595	High_risk	-1.44964
TCGA-AD-6890-01	2.04384	0	3.73211	7.66928	6.65913	6.26197	2.39558	11.3649	6.63989	1.69688	5.47236	Low_risk	-1.6291
TCGA-A6-2676-01	3.57534	1	3.43661	8.0897	6.50632	7.08978	3.29013	9.17816	6.66242	0.182692	7.1863	High_risk	-1.3333
TCGA-CM-5862-01	0.419178	1	2.64837	6.41307	5.35892	5.34838	1.26075	8.63945	3.94249	2.55537	3.28576	High_risk	-1.36523
TCGA-AA-3815-01	2.75342	0	3.90431	6.87404	5.66354	6.4165	2.23992	10.0555	5.29376	1.84515	6.44411	High_risk	-1.35948
TCGA-A6-6648-01	2.09863	0	3.03559	7.29836	7.1586	6.36672	1.5474	10.6887	5.1911	7.04976	4.61151	Low_risk	-1.72927
TCGA-D5-5541-01	4.66027	0	2.4741	7.21968	6.67125	6.1426	1.12572	9.92405	4.00217	0.311968	5.14696	Low_risk	-1.65727
TCGA-CM-6679-01	0.838356	0	2.53628	6.41134	5.13679	5.59274	1.36323	10.383	3.90197	0.472488	3.57284	Low_risk	-1.56488
TCGA-AA-A02K-01	1.16712	1	3.21959	7.39462	6.07844	6.16304	4.47884	10.1524	5.37391	0.412402	3.19746	High_risk	-1.29746
TCGA-A6-3810-01	3.04384	0	2.97563	5.84501	5.18079	4.85689	1.5182	8.57702	2.46537	0.628478	3.31617	High_risk	-1.22165
TCGA-CM-6677-01	0.923288	0	2.37896	7.80774	6.64986	6.81606	1.0345	10.6495	2.22974	0.494364	6.98079	Low_risk	-1.79223
TCGA-G4-6306-01	3.72329	0	2.47477	6.48009	5.40733	6.13905	3.9047	11.3358	6.27502	5.69028	6.95933	High_risk	-1.53919
TCGA-AA-3693-01	0	0	2.44697	7.12835	5.47045	5.71461	0.708585	10.1295	1.58727	0.793937	3.03888	Low_risk	-1.6424
TCGA-AA-3712-01	0	0	3.28778	7.54294	6.57379	6.99165	2.07789	10.6575	3.93813	2.99144	5.96218	Low_risk	-1.60611
TCGA-AA-3837-01	3.24932	0	3.20491	6.64014	5.78058	6.2218	2.74147	11.3397	3.81857	5.54964	4.38121	Low_risk	-1.56062
TCGA-A6-3807-01	2.88767	0	2.79327	6.83336	5.87442	6.30557	1.36278	10.0545	3.27718	3.45737	5.86579	Low_risk	-1.57058
TCGA-CM-6170-01	1.25205	0	2.28898	6.90138	5.50156	5.83604	1.37751	10.7971	3.70831	0.269033	2.31542	Low_risk	-1.69139
TCGA-AZ-6600-01	1.00822	1	3.03339	6.98106	5.80654	6.28643	2.12218	10.1821	5.39575	4.03064	6.51099	High_risk	-1.51715
TCGA-AA-A00O-01	2.25205	0	2.88202	4.56496	4.61192	6.07618	1.97063	9.57908	2.58648	1.18878	2.46824	High_risk	-1.23948
TCGA-AA-3941-01	2	0	3.3454	7.42306	5.41204	6.20735	2.70777	10.6719	1.61937	3.50839	5.70499	High_risk	-1.4588
TCGA-F4-6856-01	2.94247	0	2.10966	7.26733	6.46726	6.01121	2.61796	11.387	3.1348	0.0817487	5.51278	Low_risk	-1.73279
TCGA-DM-A1HA-01	10.9589	0	1.94703	5.78427	6.20449	5.93429	3.23617	9.83508	1.10467	0.0353424	5.32061	High_risk	-1.3887
TCGA-AA-3495-01	3.08767	0	3.01042	7.23137	6.41586	5.77465	1.42911	10.5513	3.39838	7.44876	5.68951	Low_risk	-1.66613
TCGA-AA-3862-01	2.50411	0	2.74504	7.87537	5.57252	6.03888	3.9099	11.2172	7.66836	5.44176	5.81824	Low_risk	-1.59061
TCGA-F4-6460-01	2.66301	1	2.69017	6.42546	5.11729	5.06169	2.30545	10.1174	5.80501	3.06783	5.68791	High_risk	-1.45371
TCGA-CM-6162-01	1	0	1.50421	6.83254	6.53474	5.11735	2.67297	10.9913	6.45943	1.71422	6.3505	Low_risk	-1.75746
TCGA-G4-6302-01	5.60822	1	1.40779	5.46663	5.12147	5.29006	1.63231	8.44718	4.27498	0.865444	5.96195	High_risk	-1.38251
TCGA-AA-3511-01	0.580822	0	2.1653	6.8048	5.73999	5.61208	1.98287	10.6637	3.50401	4.14329	4.81955	Low_risk	-1.65807
TCGA-AA-A017-01	1.25205	0	2.22237	5.82534	4.7161	5.83689	2.63787	9.69417	4.58041	1.72133	5.18862	High_risk	-1.36793
TCGA-CM-6167-01	1.24932	0	2.30545	6.08937	5.44602	5.242	1.27268	9.57391	3.87861	2.62274	5.40438	High_risk	-1.50241
TCGA-AA-3553-01	2	0	3.4279	6.90741	6.23387	7.11871	1.02475	10.0061	5.5283	4.01535	4.2007	Low_risk	-1.57419
TCGA-CK-6751-01	10.3562	0	2.20817	7.41065	6.43724	6.39669	1.47503	11.2162	2.86604	0.359184	6.48147	Low_risk	-1.81129
TCGA-AA-A02E-01	0.246575	1	3.65901	6.204	5.30179	5.53083	1.84463	10.2865	3.2172	2.86857	7.03272	High_risk	-1.3729
TCGA-DM-A1D6-01	4.1589	1	2.79192	7.27229	6.0459	5.31639	1.70252	11.6943	0.887837	0	5.47305	Low_risk	-1.72011
TCGA-AA-A01S-01	0.0849315	0	2.94759	6.84001	6.25265	6.93005	1.32406	11.799	1.2246	4.10186	6.49439	Low_risk	-1.78143
TCGA-A6-6141-01	0.69863	0	2.50919	6.36055	6.08345	5.4392	1.57638	11.1488	4.92594	1.82379	6.4312	Low_risk	-1.69523
TCGA-A6-2681-01	3.8	0	2.57674	6.87386	5.66757	7.09113	2.55024	11.2534	3.8015	2.89422	8.14154	Low_risk	-1.64256
TCGA-AA-A00N-01	0.334247	1	2.84651	6.51955	5.55437	5.60701	1.89274	10.749	2.94765	0.561986	7.1127	High_risk	-1.5383
TCGA-DM-A0X9-01	9.97534	0	3.17359	7.18236	6.33593	6.46276	1.82093	11.6225	2.63304	2.55599	6.11994	Low_risk	-1.70863
TCGA-AA-3684-01	0	0	2.59347	6.03624	5.03566	6.60546	7.7757	11.4824	6.52623	5.70944	7.23803	High_risk	-1.16651
TCGA-AY-A71X-01	1.61096	0	2.96796	5.5835	5.81576	5.69757	2.50757	11.9558	2.31574	0	6.54279	Low_risk	-1.568
TCGA-AA-A00U-01	1.41918	0	3.13394	7.69848	6.40213	6.74527	1.75574	10.2021	1.67428	0.170951	4.46396	Low_risk	-1.5587
TCGA-DM-A1D8-01	1.04932	1	3.03152	6.72645	4.9619	5.56588	2.2998	9.54404	1.41473	0.0234683	5.27361	High_risk	-1.30103
TCGA-AY-6196-01	0.0164384	0	2.27754	4.63157	4.64716	4.2335	1.74433	10.2248	4.35059	3.04327	6.12139	High_risk	-1.41657
TCGA-A6-6650-01	1.71781	0	3.17824	7.81108	6.27974	5.80627	1.73387	9.8225	2.60394	2.992	6.28863	High_risk	-1.52072
TCGA-G4-6625-01	7.64932	0	2.56591	6.28106	6.3438	5.69024	2.23704	10.5201	5.19095	5.22019	4.23076	Low_risk	-1.58895
TCGA-AA-A022-01	0	0	3.33714	5.64827	4.63174	5.78199	2.23717	8.37919	4.10809	2.16726	7.3212	High_risk	-1.08627
TCGA-F4-6459-01	0.717808	1	1.89906	6.68678	5.76693	4.70216	1.12314	11.3945	5.09431	0.731531	6.42735	Low_risk	-1.82959
TCGA-D5-6529-01	1.68219	0	1.91758	6.95319	6.15596	5.76488	0.976217	10.6562	4.21188	0.101381	4.03388	Low_risk	-1.78718
TCGA-CM-5348-01	1.91507	0	2.78411	4.94972	5.11341	4.86727	2.67091	9.2916	6.75131	3.4932	5.6889	High_risk	-1.23025
TCGA-A6-2679-01	3.74247	0	3.59573	5.22694	3.98997	6.04006	5.53152	10.1479	5.71244	5.354	6.13901	High_risk	-0.968536
TCGA-AA-A00D-01	1.58356	0	2.47617	6.87763	6.03514	5.81717	1.41067	9.08994	3.84897	0.241718	5.95334	High_risk	-1.47341
TCGA-DM-A28C-01	6.78082	1	2.67789	6.06772	5.58035	6.23084	2.99854	10.239	1.04243	0.399882	1.25387	High_risk	-1.37003
TCGA-CA-5255-01	1.03014	0	2.16665	6.40204	5.50139	5.76826	3.42196	11.5031	3.69343	2.09704	6.66465	Low_risk	-1.58906
TCGA-AA-3519-01	0.756164	0	2.77395	7.54296	6.22501	5.95269	2.33348	10.2979	5.57575	6.37047	5.50766	Low_risk	-1.60869
TCGA-CA-5256-01	1.03836	0	2.7185	7.82153	5.69418	6.06343	0.830174	10.9578	4.51247	3.4037	5.36309	Low_risk	-1.79609
TCGA-AD-5900-01	1.0137	0	2.11397	7.16974	6.11715	6.69662	3.9074	10.5628	2.57812	0.192447	4.40618	High_risk	-1.50149
TCGA-AZ-6599-01	0.564384	1	3.0836	5.89303	5.78637	5.41924	1.64994	11.4628	1.5865	0.135666	4.65288	Low_risk	-1.57827
TCGA-G4-6586-01	2.98356	0	2.45618	7.66446	6.28142	6.01951	4.43685	10.9588	5.0675	1.49595	7.70768	High_risk	-1.5155
TCGA-AA-3518-01	0.0849315	0	3.84406	7.48531	5.85209	6.57072	3.1039	10.8505	4.00538	1.63756	7.11345	High_risk	-1.42105
TCGA-NH-A6GA-01	0.827397	1	3.77535	7.15631	6.28974	6.53508	2.62539	10.5408	6.42284	1.05033	6.15607	High_risk	-1.45229
TCGA-AA-3688-01	1.58356	0	3.25143	7.17906	6.39622	6.63332	2.28084	10.5448	3.24051	4.8005	5.99414	High_risk	-1.54987
TCGA-A6-6782-01	1.69041	0	2.00673	6.04439	5.27905	5.29168	1.29555	9.80612	2.17188	2.55363	2.65606	High_risk	-1.54361
TCGA-F4-6461-01	0.926027	1	2.5613	5.64434	5.26156	5.34926	2.18336	11.3722	2.7105	3.55997	4.26634	Low_risk	-1.57712
TCGA-AA-A02Y-01	3.33151	0	2.38184	6.27	5.73255	6.1122	3.12272	11.0506	6.02327	4.38252	6.61882	Low_risk	-1.57608
TCGA-CA-6717-01	1.06301	0	1.88417	7.26168	6.61019	6.08105	0.653427	10.8873	3.44097	0.125651	6.52691	Low_risk	-1.88109
TCGA-AZ-4682-01	1.86301	1	2.92761	7.04771	5.823	6.01799	3.38648	10.5871	6.10992	5.13121	5.57293	High_risk	-1.48368
TCGA-AA-3846-01	1.41918	0	3.35068	6.63716	5.41077	6.40705	1.34869	9.83598	4.17899	5.01817	4.20319	High_risk	-1.46626
TCGA-CM-5861-01	1.25205	0	1.15801	6.54805	5.77312	5.4936	3.38088	10.9713	2.66298	0	6.12679	Low_risk	-1.64472
TCGA-AZ-6603-01	2.46301	1	2.59221	6.51713	6.01496	6.03157	1.23915	10.8766	3.092	1.40354	4.36519	Low_risk	-1.67877
TCGA-A6-6649-01	2.0137	0	3.13384	6.57514	5.96084	5.5352	3.82526	11.5827	3.56217	6.74664	6.44735	High_risk	-1.50112
TCGA-CA-5797-01	1.04932	0	2.09058	7.07251	5.92202	6.76955	2.80147	11.6241	6.54387	1.41121	7.01779	Low_risk	-1.76039
TCGA-3L-AA1B-01	1.30137	0	3.78847	6.3765	5.79899	5.64747	1.5212	10.4827	3.28404	0.0861044	5.11629	High_risk	-1.42884
TCGA-CK-5914-01	1.83288	0	3.46176	7.67734	6.75307	6.5556	0.999278	10.8916	2.47936	0.200002	3.84507	Low_risk	-1.69074
TCGA-D5-6541-01	1.29863	0	2.47703	6.07262	5.73705	5.23577	1.3729	10.37	3.37083	3.25694	5.05339	Low_risk	-1.58273
TCGA-AA-3966-01	0.167123	0	3.27684	7.28633	6.18532	5.37437	1.73318	10.2884	3.68716	0.824075	5.39013	High_risk	-1.52274
TCGA-CM-6675-01	1.08767	0	2.85122	6.35801	7.02783	5.66878	2.95071	10.609	6.51741	1.43851	9.47185	High_risk	-1.51833
TCGA-CM-4750-01	0.668493	0	3.03576	7.53813	6.27966	6.62227	1.08801	10.5507	3.66416	2.63292	7.51883	Low_risk	-1.68631
TCGA-AA-A00Z-01	1.83288	0	3.68967	7.5072	7.06344	6.47618	1.00978	10.0516	3.92526	5.79456	5.96782	Low_risk	-1.60691
TCGA-AY-6386-01	1.48493	0	1.89918	7.29388	6.61658	6.12398	1.13284	11.8058	4.21697	0.36087	7.48112	Low_risk	-1.96049
TCGA-G4-6321-01	1.8411	0	1.25381	4.34351	3.84523	3.58306	6.2044	12.0108	3.76649	6.85073	7.7683	High_risk	-1.32336
TCGA-G4-6320-01	2.20274	0	3.04855	6.58857	5.44713	5.16818	2.37929	10.756	5.27534	2.48592	5.94366	High_risk	-1.49925
TCGA-AA-A00K-01	1.50411	0	3.70162	7.29531	6.1097	6.53457	2.57833	12.0351	5.87155	5.13604	7.9653	Low_risk	-1.66912
TCGA-AA-A01I-01	2.58356	0	2.5474	7.29615	6.29662	5.71856	0.31823	10.0417	2.47275	2.65338	5.14581	Low_risk	-1.71749
TCGA-A6-5660-01	2.43288	0	1.94092	6.05897	6.15987	6.30826	0.888539	10.2398	3.32998	1.10722	5.50836	Low_risk	-1.69288
TCGA-CK-6747-01	6.91233	0	1.39928	7.34648	6.49735	6.10385	0.867106	11.8581	4.19434	1.48089	6.02962	Low_risk	-2.05748
TCGA-4N-A93T-01	0.4	0	3.02331	5.27296	4.91221	5.47616	3.0045	10.8762	2.49654	1.18884	6.00693	High_risk	-1.33253
TCGA-AA-3952-01	0.167123	1	3.63664	6.54048	5.77144	5.19895	6.46964	9.72505	1.35078	4.03276	5.47103	High_risk	-0.925328
TCGA-NH-A6GB-01	1.30411	0	3.48425	6.72424	6.70769	6.40661	0.551984	9.55124	3.86175	2.75215	7.08526	High_risk	-1.52714
TCGA-D5-6931-01	1	0	3.20936	7.54178	7.00348	6.77848	2.06599	11.6556	5.58646	4.78241	7.98799	Low_risk	-1.77993
TCGA-AA-3973-01	1.08767	0	2.9565	5.69129	5.26558	6.28705	1.33623	9.42412	1.63636	0	3.77295	High_risk	-1.34719
TCGA-AA-3841-01	3.07945	0	2.68621	6.05706	5.35193	6.97844	2.56759	11.1224	5.81355	5.7911	7.89683	Low_risk	-1.58513
TCGA-A6-6654-01	1.98904	0	2.01303	5.28785	5.90678	5.72693	1.05346	9.47938	5.89867	1.32493	5.02211	High_risk	-1.53645
TCGA-A6-2674-01	3.64658	0	3.78611	5.7082	5.33815	4.72077	1.08002	9.37777	2.46369	0.96579	3.84317	High_risk	-1.25927
TCGA-AA-A02H-01	0.167123	1	4.00606	6.122	4.978	6.07113	1.33925	10.1442	3.88311	4.8613	6.02688	High_risk	-1.3658
TCGA-AA-3510-01	5.33151	0	2.87867	6.85253	5.55224	6.47448	1.93731	11.0253	3.62309	4.8829	4.67841	Low_risk	-1.63205
TCGA-AA-3562-01	1.66575	0	2.99605	6.43436	5.55913	6.61497	2.21925	10.8816	5.67061	7.41843	5.76425	Low_risk	-1.58611
TCGA-DM-A280-01	0.646575	1	1.25966	6.9388	6.14587	5.21493	3.15309	10.8097	4.33122	2.26849	7.2746	Low_risk	-1.69598
TCGA-AA-A024-01	3.25479	1	2.4541	4.97185	4.45396	5.19741	2.42274	11.7608	1.61528	2.52552	7.27811	High_risk	-1.52017
TCGA-AA-3522-01	3.08767	0	2.97297	6.36045	5.80259	5.55586	1.48841	11.9175	3.61327	4.81249	4.93928	Low_risk	-1.73958
TCGA-CM-6168-01	1.08219	0	2.64957	7.35947	6.6166	6.3579	1.28641	10.3857	3.94541	3.69851	4.60424	Low_risk	-1.70899
TCGA-AA-3526-01	1.58904	0	2.91426	8.27681	6.63998	6.62004	1.65053	11.4513	3.58375	3.10454	3.27277	Low_risk	-1.82883
TCGA-G4-6314-01	2.99452	0	2.92304	6.67441	6.23264	5.72455	1.11116	9.62849	2.71554	0.0908534	7.10627	High_risk	-1.49518
TCGA-G4-6315-01	5.1589	0	2.61018	7.61304	6.6216	6.47669	2.7544	11.4512	4.7038	6.81148	6.92311	Low_risk	-1.75608
TCGA-F4-6854-01	0.0438356	0	2.08267	7.31272	6.34836	6.66902	2.03404	10.3576	4.98783	4.27666	4.68698	Low_risk	-1.71105
TCGA-AA-A02F-01	3.33151	0	3.99733	8.1002	6.01176	5.98082	2.14137	10.2743	1.81873	1.14997	3.72745	High_risk	-1.43233
TCGA-AZ-6605-01	0.435616	1	2.16649	6.18265	5.63104	5.7965	1.5215	10.2368	2.48295	4.63602	4.35764	Low_risk	-1.60192
TCGA-D5-6924-01	1.19178	0	3.03554	6.79282	6.05798	6.34216	1.89778	9.93863	4.071	0.321697	4.57897	High_risk	-1.47442
TCGA-DM-A28M-01	7.93151	0	2.2798	7.2555	6.29782	6.03737	2.78191	11.0615	3.27871	2.38684	5.4791	Low_risk	-1.66542
TCGA-DM-A1D4-01	7.72877	1	2.48967	6.53409	5.31756	5.24436	2.69017	10.3742	7.65239	0.458067	6.86741	High_risk	-1.49221
TCGA-DM-A1D9-01	11.6986	0	2.6381	7.54775	5.72328	5.78731	2.34599	9.73018	1.80459	0.0250288	5.06344	High_risk	-1.45621
TCGA-D5-6928-01	0.969863	0	2.8506	6.48762	5.87473	5.17472	3.04939	9.84918	8.47382	1.58174	4.3773	High_risk	-1.38994
TCGA-AZ-6606-01	0.978082	1	2.68001	8.22149	6.92429	6.06786	1.01278	11.4424	3.09331	1.39276	5.82531	Low_risk	-1.89628
TCGA-AA-A02W-01	3.41644	0	3.86942	6.49242	5.52509	6.49699	1.04243	9.37501	2.47496	0.224411	5.9268	High_risk	-1.32331
TCGA-AA-3542-01	1.08219	0	3.18514	6.70386	4.46246	6.55288	1.46733	11.702	6.57666	3.73233	3.91238	Low_risk	-1.68427
TCGA-CK-6746-01	0	0	2.57296	7.97767	6.60688	6.47389	1.92494	8.14668	1.31493	0.0485152	5.89357	High_risk	-1.37395
TCGA-F4-6569-01	2.97808	0	1.43648	6.51765	5.74286	5.96975	1.55983	9.76675	3.48615	0.0790196	5.34587	Low_risk	-1.6352
TCGA-AA-3529-01	0	1	3.57037	7.75212	6.43603	7.20904	1.53147	10.8209	6.35151	6.9939	5.35541	Low_risk	-1.69703
TCGA-AA-3524-01	3.00274	0	3.46567	8.17492	6.06021	6.54167	2.16211	11.0471	5.92132	5.02803	6.32188	Low_risk	-1.66338
TCGA-AA-A02O-01	0.0767123	0	3.10719	6.42533	5.25102	6.02798	1.97085	11.0024	3.7941	0.646347	4.74792	High_risk	-1.52869
TCGA-CM-4752-01	1.08493	0	2.55402	6.01239	5.61711	6.08257	1.85679	10.3772	4.74957	5.94939	3.84357	Low_risk	-1.56506
TCGA-AA-3692-01	3	1	3.7279	7.26769	5.88734	6.07492	1.9143	10.5932	5.60116	4.57522	4.50733	High_risk	-1.52673
TCGA-AA-3520-01	2.00274	0	3.33661	7.91931	5.91632	6.23861	2.96962	11.0153	3.35963	6.3097	4.39197	Low_risk	-1.5657
TCGA-AY-5543-01	2.75068	0	1.59698	7.77989	6.17294	6.02144	2.15927	10.7341	2.77516	2.57961	5.20922	Low_risk	-1.78506
TCGA-AA-3534-01	2.41644	0	4.33491	7.15396	6.0133	6.1409	1.2906	10.2341	5.85314	4.83607	5.06578	High_risk	-1.46666
TCGA-AA-3971-01	1.33973	0	2.82422	6.45866	5.03603	6.16372	2.46519	11.1021	5.60282	6.86418	5.70264	Low_risk	-1.5806
TCGA-CA-6719-01	1.19178	0	2.38778	6.06993	5.72025	6.68306	1.51884	10.379	1.9974	0.400538	7.53515	Low_risk	-1.56736
TCGA-AA-3818-01	0.0821918	1	3.34528	7.01472	5.83186	5.88631	1.65012	11.1574	2.78977	0.421802	7.09626	Low_risk	-1.59211
TCGA-AD-6895-01	2.09041	0	3.20614	7.23609	6.12383	6.1405	2.25767	10.5376	1.89697	0.104471	3.67162	High_risk	-1.50195
TCGA-QG-A5YV-01	3.56438	0	3.54505	7.1841	6.18404	5.86155	2.16964	11.1424	4.18126	0.154454	6.63569	Low_risk	-1.55641
TCGA-G4-6310-01	5.30137	0	1.98178	5.2454	5.05262	5.33712	1.20796	9.70267	0.982291	0.194087	5.07064	High_risk	-1.45722
TCGA-G4-6307-01	4.5863	0	2.32487	6.87065	5.86873	6.12671	1.5509	10.8334	2.04653	1.94373	5.35263	Low_risk	-1.68673
TCGA-CM-5341-01	2.42192	0	2.11776	7.0311	5.30202	5.19614	0.910963	10.4252	5.29269	1.58121	2.45807	Low_risk	-1.71991
TCGA-G4-6627-01	6.23288	0	2.12274	6.82626	5.67086	5.25404	1.87955	10.9914	4.89648	5.73076	6.0743	Low_risk	-1.72731
TCGA-AA-3538-01	2.16712	0	3.15758	6.63809	5.68165	6.65246	1.43082	10.5657	6.00361	6.81903	4.88092	Low_risk	-1.61515
TCGA-AA-3544-01	1.16712	0	2.97109	7.19029	5.91233	5.83264	2.41649	9.94758	5.12181	5.82012	4.17112	High_risk	-1.49199
TCGA-AA-3496-01	0.0849315	0	3.03309	5.17137	5.75802	5.99121	1.22206	9.79222	4.16648	1.42024	2.79489	High_risk	-1.41379
TCGA-AM-5821-01	0.0767123	0	2.15708	8.26634	7.00397	6.12037	2.54194	6.00264	2.55552	0.631151	5.43797	High_risk	-1.14992
TCGA-D5-6535-01	1.26027	0	2.17683	6.57838	5.98597	5.81693	2.60376	10.8137	2.61478	0.754118	8.21487	Low_risk	-1.58735
TCGA-D5-6532-01	1.52055	0	2.03316	7.50987	6.691	6.50948	2.37259	10.7033	3.23094	0.598175	4.73528	Low_risk	-1.71518
TCGA-AA-3930-01	0.167123	1	4.14004	7.86126	6.54652	5.68652	2.47192	10.3079	2.25511	5.20479	6.16169	High_risk	-1.42234
TCGA-AY-A54L-01	1.43836	0	3.05627	7.24769	6.15859	5.82434	1.11597	10.1955	2.8434	3.66722	5.66382	Low_risk	-1.60559
TCGA-AZ-4308-01	9.10685	0	2.8979	6.34981	4.75234	6.86139	3.58266	10.692	6.78537	3.30062	4.95366	High_risk	-1.40162
TCGA-5M-AATE-01	3.28767	0	2.83806	6.83627	6.33635	6.09679	1.12413	9.12196	1.39583	0.715718	3.5817	High_risk	-1.45709
TCGA-F4-6704-01	0.128767	0	1.7169	5.74924	5.15867	5.76162	1.22626	9.98226	6.04397	0.213627	5.78901	Low_risk	-1.60704
TCGA-CM-6172-01	0.917808	0	2.31609	6.96738	6.07039	5.35563	1.74846	10.7243	3.89205	3.90396	5.40313	Low_risk	-1.6898
TCGA-A6-6781-01	1.63836	0	2.45794	5.69571	5.01067	4.56185	1.13214	9.3881	3.67817	0.538041	5.98784	High_risk	-1.40611
TCGA-RU-A8FL-01	3.22466	0	2.98688	7.35822	6.45823	5.92109	1.85878	9.59675	5.93398	0.213876	3.51357	High_risk	-1.50371
TCGA-AA-3821-01	0.0849315	0	4.10645	7.13378	5.77132	5.94893	3.17811	10.6872	4.56664	0.198494	6.34585	High_risk	-1.32658
TCGA-F4-6808-01	2.80548	0	2.016	7.15555	5.9893	6.02486	2.18272	10.0242	4.54985	2.04862	6.97041	Low_risk	-1.61024
TCGA-AA-3994-01	2.25205	0	3.66045	6.88779	5.51245	6.03882	2.06499	10.649	2.56857	0.839073	6.05299	High_risk	-1.43659
TCGA-AZ-6607-01	0.265753	1	1.35473	5.95014	5.33089	4.33344	1.26634	8.8075	3.89389	1.86148	4.53879	High_risk	-1.49479
TCGA-DM-A1D7-01	1.10959	1	3.23439	7.40999	6.20234	5.48355	3.14253	10.6381	4.34191	0.831067	5.91579	High_risk	-1.46123
TCGA-AD-A5EJ-01	0	0	2.98594	7.03497	6.21504	5.1936	1.66944	11.1197	5.2849	0.0399806	6.70414	Low_risk	-1.65865
TCGA-D5-6932-01	0.947945	0	2.17562	6.9209	5.48688	6.24078	2.07272	10.0784	1.12955	0.184471	4.56093	High_risk	-1.53455
TCGA-AD-6901-01	1.86849	1	3.20636	5.75161	4.87325	5.45951	2.54013	10.1327	2.40329	0.86132	5.64464	High_risk	-1.28282
TCGA-AA-3848-01	0.838356	1	3.57341	6.64347	5.5734	7.41892	4.00792	10.6301	2.77848	3.64029	7.13993	High_risk	-1.29868
TCGA-AA-3543-01	0.0821918	0	3.10899	7.22404	5.69404	6.07859	5.47641	11.0807	6.64026	1.45323	8.07763	High_risk	-1.32162
TCGA-AZ-5407-01	7.35068	0	2.18907	6.97246	6.20806	5.96146	1.80822	11.3456	3.97326	0.152897	5.5665	Low_risk	-1.76823
TCGA-A6-5667-01	2.43014	0	2.15049	7.68033	6.39535	6.55626	1.11383	11.1472	3.13194	0.695905	6.16044	Low_risk	-1.86268
TCGA-AA-A00W-01	1.24932	0	3.29134	6.88698	5.94148	6.62823	1.99027	10.7382	3.14563	2.75067	4.51488	High_risk	-1.5453
TCGA-AA-3664-01	4.50137	0	4.20201	6.91821	5.67293	6.01322	2.02793	10.1708	5.42019	2.77951	6.1168	High_risk	-1.36111
TCGA-AD-6964-01	0.906849	1	2.38659	6.22192	5.34956	5.56177	1.35298	9.47463	4.45883	0.383939	3.27648	High_risk	-1.47448
TCGA-DM-A285-01	0.490411	1	2.91351	6.21395	6.16887	5.31138	1.15497	10.1351	2.74803	4.94013	6.32001	Low_risk	-1.55175
TCGA-A6-5664-01	1.8411	0	2.23033	6.82446	6.22266	5.92233	0.595408	10.5722	6.95454	1.26279	5.35462	Low_risk	-1.80044
TCGA-A6-A5ZU-01	0.80274	0	2.57884	4.96683	4.75185	4.41483	1.21642	9.25284	3.72957	0	5.59066	High_risk	-1.3088
TCGA-F4-6806-01	3.45205	0	2.59963	6.10762	5.37755	5.44558	1.72461	11.2215	5.9091	0.849999	5.59254	Low_risk	-1.63786
TCGA-F4-6703-01	3.98904	0	1.69095	6.49275	6.30808	5.28872	0.848317	7.72924	2.02152	0.41846	4.76752	High_risk	-1.41917
TCGA-AA-3972-01	4.24932	0	3.29876	7.23195	6.00853	6.05815	1.61786	10.3448	1.9492	4.4513	4.451	High_risk	-1.54408
TCGA-AA-3869-01	2.25205	1	3.21982	7.1334	5.76543	5.78981	2.09464	9.80161	5.35998	1.22398	7.13395	High_risk	-1.43126
TCGA-CM-6678-01	0.917808	0	2.1155	6.73685	5.84903	5.73139	1.35287	10.7124	2.04264	0.586501	4.2825	Low_risk	-1.69335
TCGA-AA-A00F-01	2.83562	0	3.23665	6.33695	5.19956	5.88501	3.77208	10.4519	5.58969	7.43075	6.5185	High_risk	-1.3332
TCGA-G4-6628-01	6.6411	0	2.50057	7.92199	6.77284	6.46457	1.85997	7.70861	4.69644	3.5962	3.43554	High_risk	-1.39406
TCGA-G4-6303-01	5.48767	1	2.5793	6.64026	6.02117	6.94186	2.024	9.8601	1.77058	0.627046	6.45079	High_risk	-1.48592
TCGA-AA-3947-01	2.75068	0	3.00829	8.62122	6.71593	4.95871	0.857981	9.183	2.55309	0.331247	3.15152	Low_risk	-1.5811
TCGA-AA-3986-01	1.58904	0	3.14137	6.30704	5.26777	5.7909	1.56096	10.3066	6.68222	4.71825	5.97508	High_risk	-1.51571
TCGA-DM-A28F-01	2.99726	1	3.15889	7.16558	6.22508	5.78437	2.79631	11.3965	3.62833	4.23479	7.6146	Low_risk	-1.59887
TCGA-A6-A566-01	2.07671	1	2.89935	6.81084	5.99845	5.35107	2.89066	9.97847	6.0942	0.217851	5.82137	High_risk	-1.40903
TCGA-AA-3673-01	4.16986	0	2.81617	7.32186	6.25228	6.39784	1.60971	10.5833	3.92488	3.38315	5.48524	Low_risk	-1.66354
TCGA-F4-6807-01	3.5863	0	1.71914	6.85837	6.194	5.91604	0.899253	9.98758	3.58095	0.566377	4.20435	Low_risk	-1.73083
TCGA-AA-3968-01	1.83288	0	3.46332	6.89964	6.30321	6.19281	2.53461	10.0399	3.2288	6.10814	5.81138	High_risk	-1.42116
TCGA-DM-A28A-01	2.20548	1	4.05967	6.29477	6.71273	6.25399	2.32562	10.9293	1.28404	0	4.43814	High_risk	-1.40606
TCGA-4T-AA8H-01	1.05479	0	3.05052	6.26884	6.32552	5.52192	1.79963	10.8952	3.74839	3.86373	5.5221	Low_risk	-1.58808
TCGA-AA-3855-01	2.67123	0	3.40745	7.03694	5.66227	6.14296	2.74687	11.0113	8.99026	6.63876	5.86643	Low_risk	-1.56329
TCGA-G4-6298-01	1.9589	1	3.73328	6.42853	6.17812	5.94111	1.70461	9.38838	3.08045	0.353662	5.44503	High_risk	-1.30736
TCGA-AA-3506-01	4.83562	0	2.67749	6.68886	6.1759	6.70009	1.97596	11.9201	8.24541	6.0346	6.23292	Low_risk	-1.83192
TCGA-CM-6163-01	1.16986	0	2.28345	6.25933	6.10927	5.64716	2.20839	10.6089	4.0985	4.95973	5.05082	Low_risk	-1.61224
TCGA-CK-5916-01	1.76164	1	1.90728	7.42975	6.55951	6.50448	4.22561	9.35246	2.22095	0.055751	6.32246	High_risk	-1.37469
TCGA-CK-6748-01	0.167123	0	1.21711	5.87578	4.96228	5.78162	0.719841	10.869	1.99367	0.0366088	3.8771	Low_risk	-1.78605
TCGA-AA-A004-01	1.16164	0	3.06003	5.20837	4.29039	6.19906	3.35511	10.0384	8.49905	7.25449	6.70565	High_risk	-1.26363
TCGA-AA-A03F-01	1.50411	1	2.85985	5.44416	4.53977	6.26645	3.50579	11.8661	5.46642	0.647453	8.64274	High_risk	-1.45494
TCGA-A6-2686-01	3.08493	1	3.37719	6.01287	5.69441	6.11555	7.39138	11.3169	3.80642	0.342555	6.17238	High_risk	-1.04842
TCGA-F4-6855-01	3.95068	0	2.55623	6.22587	5.18031	5.97066	1.44037	10.7734	2.68652	0.0676387	5.4539	Low_risk	-1.5845
TCGA-CA-6715-01	1.04932	0	2.32472	7.47212	6.94149	6.30921	1.26442	10.067	2.75136	3.22736	7.22468	Low_risk	-1.71463
TCGA-AA-3666-01	0.167123	1	3.1694	7.73716	5.932	5.60298	3.31365	10.5482	6.64903	4.92557	4.56379	High_risk	-1.49988
TCGA-NH-A50U-01	0.915068	1	3.91271	7.2921	5.93604	5.72015	2.73548	10.2374	2.983	1.25574	6.04988	High_risk	-1.33995
TCGA-AA-A01D-01	0.915068	1	3.9575	6.75628	5.674	6.41422	6.48127	10.6403	4.99129	4.66905	7.22371	High_risk	-1.0579
TCGA-DM-A1D0-01	10.8877	0	2.29834	7.15984	6.38263	5.78139	2.40485	11.1442	0.369829	0.223793	3.49953	Low_risk	-1.6639
TCGA-A6-2675-01	3.61918	0	2.11806	5.35926	5.57309	6.03408	1.9313	11.231	5.49287	5.71691	4.69981	Low_risk	-1.68069
TCGA-CK-5913-01	4.27671	0	1.93353	7.74968	6.53672	6.14682	5.79934	11.0025	3.03982	0.201508	7.11365	High_risk	-1.45632
TCGA-AA-3488-01	0.419178	1	2.86877	6.80159	6.03229	6.79665	2.44742	10.3404	6.71949	5.83594	6.34945	Low_risk	-1.55804
TCGA-AA-3560-01	1.66575	0	2.13001	7.41773	5.51531	6.64981	0.800496	11.8054	5.55323	4.52235	6.42096	Low_risk	-1.967
TCGA-G4-6311-01	3.28493	0	2.87352	6.63613	6.45026	6.2795	2.18078	10.5227	4.12102	6.01027	5.88835	Low_risk	-1.58367
TCGA-AA-3525-01	0.671233	0	3.21	7.28211	5.89526	5.96555	3.09977	10.9965	6.22854	5.48038	7.0974	High_risk	-1.54288
TCGA-D5-6922-01	0.843836	0	2.6931	6.68541	6.19022	6.32074	1.64312	10.407	5.91364	1.59612	7.32061	Low_risk	-1.61731
TCGA-DM-A288-01	1.16986	1	3.94556	6.37921	5.68584	5.73253	3.04548	10.7486	2.89598	1.16176	7.06089	High_risk	-1.30509
TCGA-D5-6536-01	1.48767	0	2.35966	6.1539	5.72167	5.25761	2.51619	10.5757	0.86995	0.212134	4.07481	High_risk	-1.48505
TCGA-AA-A01G-01	1	0	3.5673	7.33973	6.90793	6.87453	2.24932	11.7608	3.64833	5.71545	3.82374	Low_risk	-1.71177
TCGA-NH-A8F7-01	1.48767	0	3.26984	6.28492	6.0072	6.02485	1.47457	10.7088	1.82587	0.974162	3.69166	High_risk	-1.52735
TCGA-AZ-4684-01	5.41644	0	1.9565	5.84873	5.97404	6.3052	1.49697	10.4346	6.79788	4.57898	5.89825	Low_risk	-1.69342
TCGA-AA-3667-01	1.16712	0	3.21204	6.07987	4.79578	6.81952	2.44864	10.1762	3.17687	3.4068	4.37832	High_risk	-1.35445
TCGA-AD-6899-01	0.482192	1	2.32665	6.94703	5.71401	5.98565	2.39226	10.7476	3.06769	0.36233	7.33067	Low_risk	-1.59399
TCGA-A6-5665-01	1.83836	0	3.06694	6.86953	5.48887	5.67677	1.18745	10.1376	5.40458	3.45014	6.09977	Low_risk	-1.55825
TCGA-AA-A00L-01	3.16986	0	3.18927	6.5212	6.35924	6.51461	1.78245	10.6579	3.40477	4.5631	4.01028	Low_risk	-1.57623
TCGA-A6-2677-01	2.0274	1	3.0838	6.95834	6.41854	5.89352	1.12638	10.276	2.73226	0.987503	4.20124	Low_risk	-1.59058
TCGA-QG-A5YX-01	2.74795	0	2.89226	7.16962	7.01188	5.82489	1.54542	11.9956	5.82999	5.74258	7.07445	Low_risk	-1.88165
TCGA-CM-5863-01	1.25205	0	1.70266	5.49636	5.09107	5.20385	1.94358	11.8009	4.61285	0.790939	5.63082	Low_risk	-1.73578
TCGA-AA-3864-01	4.41644	0	3.12459	8.29909	7.01413	6.08644	2.15267	11.3538	2.42897	2.5987	6.31089	Low_risk	-1.74015
TCGA-AA-3975-01	2.83836	0	3.0377	6.139	5.48045	6.34198	2.2314	10.3379	5.07518	5.85631	4.55887	High_risk	-1.47448
TCGA-A6-6137-01	2.25753	0	2.52627	5.77702	5.92777	5.8996	1.47436	11.334	4.31823	5.26104	6.99229	Low_risk	-1.70617
TCGA-AA-A00J-01	1.50411	0	3.51062	6.87155	5.46856	6.09123	1.45223	10.2045	2.61953	1.47124	5.66551	High_risk	-1.45686
TCGA-AA-3852-01	0	1	3.56927	7.07301	5.99069	6.40167	1.31644	11.0095	2.45878	1.15484	6.02131	Low_risk	-1.59645
TCGA-AA-3856-01	0.0821918	0	3.64337	6.34003	5.40276	6.26243	1.84254	10.5331	5.38463	5.18775	6.24127	High_risk	-1.46297
TCGA-CK-4952-01	1.30137	0	3.05115	7.75792	6.82247	6.93027	1.02694	11.0451	4.64088	0.455018	5.58231	Low_risk	-1.78921
TCGA-A6-A56B-01	4.68767	1	3.63167	6.25057	5.79432	6.13531	2.52925	9.43494	2.88063	0	5.28606	High_risk	-1.224
TCGA-CM-4746-01	3.08493	0	2.54612	7.19118	5.59902	6.50498	1.1624	12.2901	3.18512	0.280362	5.31838	Low_risk	-1.88584
TCGA-G4-6295-01	0.69589	0	2.77351	6.99045	6.01865	6.56916	0.920674	8.92966	3.41349	2.81426	5.83233	High_risk	-1.48937
TCGA-DM-A28H-01	9.75616	0	3.22756	8.22234	6.69708	6.20404	2.3774	9.75189	5.70535	3.89931	2.90327	High_risk	-1.53446
TCGA-CM-5349-01	2.50685	0	3.03023	7.73055	6.14134	5.3122	2.94628	10.4291	4.75348	0.79917	4.1896	High_risk	-1.49676
TCGA-NH-A5IV-01	1.61096	0	4.12745	6.69814	5.75465	6.59936	2.62772	11.1678	3.62493	0	5.82599	High_risk	-1.40579
TCGA-AZ-5403-01	5.23288	1	1.5473	6.8046	6.28298	6.52877	1.67776	11.2991	4.16782	4.27202	4.62474	Low_risk	-1.88248
TCGA-AA-3844-01	1.24384	0	3.6555	8.12311	6.04272	6.424	1.76888	9.94584	4.2893	2.94845	6.25943	High_risk	-1.50573
TCGA-AA-3877-01	2.58356	0	3.34948	7.43306	5.91814	5.99523	4.45177	10.2269	7.36025	0.835035	5.85086	High_risk	-1.30352
TCGA-CM-6676-01	0.923288	0	2.4214	7.15194	6.28924	6.31681	1.33554	10.5804	4.36499	0.559149	6.17285	Low_risk	-1.71142
TCGA-AZ-6601-01	8.33425	1	2.86608	7.62437	6.94878	6.14022	2.54223	10.1478	5.70145	6.07698	6.74772	Low_risk	-1.59759
TCGA-AA-3509-01	5.24658	0	3.55526	7.5936	6.46338	6.15906	2.0798	11.2301	6.07232	4.17672	5.34487	Low_risk	-1.65822
TCGA-AA-3548-01	2.83288	0	2.45883	7.13202	6.08959	5.71097	2.79102	10.995	3.03318	2.60082	6.12486	Low_risk	-1.61211
TCGA-A6-2683-01	1.38082	1	2.09119	5.63304	4.81949	7.05482	2.8536	11.0954	1.26676	1.0635	6.64129	High_risk	-1.51245
TCGA-CM-4751-01	2.25205	0	2.44673	7.14469	5.2335	5.44601	1.83835	11.3404	3.95253	2.75191	6.75682	Low_risk	-1.70828
TCGA-AA-3811-01	0.838356	1	3.70456	6.78818	5.78025	6.69103	2.5523	10.1866	4.53962	4.86369	6.17984	High_risk	-1.38897
TCGA-CK-4951-01	5.84658	1	2.75022	7.14823	6.43321	5.56716	1.98251	9.13217	4.31462	0.392317	4.35118	High_risk	-1.43161
TCGA-A6-2684-01	3.08767	0	3.42229	6.81029	5.73691	5.48724	1.36076	9.6249	3.64494	0.593115	4.31735	High_risk	-1.40933
TCGA-A6-3809-01	2.72877	0	3.626	7.68242	6.16378	6.1638	1.80382	8.30063	2.97452	1.67878	3.37604	High_risk	-1.26249
TCGA-AA-3715-01	1.5863	1	2.72297	6.97099	5.58936	6.22431	2.36354	6.46626	2.85455	1.48728	4.48061	High_risk	-1.02666
TCGA-NH-A8F7-06	1.48767	0	2.81112	6.51408	6.29894	6.59582	2.03076	11.4038	3.28641	1.19717	5.52448	Low_risk	-1.66642
TCGA-AZ-4315-01	4.86575	0	2.71149	8.48635	6.24479	5.99632	1.66662	11.4147	4.06949	2.87698	5.55064	Low_risk	-1.83405
TCGA-A6-2672-01	3.88767	0	3.84548	6.73628	5.68473	5.95706	1.42755	9.73629	5.46069	0.414136	6.06159	High_risk	-1.37856
TCGA-AA-3516-01	1.08493	1	2.6586	7.48601	5.97882	6.47095	2.36866	10.1147	2.67796	5.43792	6.87527	Low_risk	-1.55633
TCGA-A6-2671-01	3.64658	1	2.08338	6.89761	5.98849	7.20585	2.02141	10.588	1.89542	0.789854	4.14973	Low_risk	-1.65856
TCGA-AA-A01V-01	0.0849315	0	3.80194	6.00401	5.71063	6.69389	1.57454	11.1471	7.23427	3.10313	6.80123	High_risk	-1.54595
TCGA-AM-5820-01	0.0383562	0	2.00058	7.34051	6.57936	5.86692	2.1034	11.0588	5.20076	0.539134	5.97361	Low_risk	-1.7792
TCGA-AA-3502-01	2.91781	0	3.10647	7.06258	5.81812	5.98218	2.35755	13.245	3.02342	0.881508	4.92331	Low_risk	-1.82774
TCGA-AA-A01P-01	3.1726	1	2.3693	6.72192	5.67083	5.41959	0.861082	8.33628	5.41386	0.869082	3.21649	High_risk	-1.4325
TCGA-A6-3808-01	2.77808	0	3.21269	7.4023	6.32653	5.93641	1.53316	10.8816	4.04433	0.809003	6.09486	Low_risk	-1.64457
TCGA-AZ-4616-01	0.427397	1	2.84559	7.19641	5.87057	5.81085	1.73244	10.0728	2.6041	0.330444	6.88588	High_risk	-1.52092
TCGA-A6-2680-01	2.92603	0	2.83671	6.9382	5.95047	6.96954	3.24812	11.0296	6.70634	5.80738	5.87469	Low_risk	-1.58327
TCGA-AD-6963-01	2.28493	0	2.47464	7.20502	7.22634	6.89607	1.74941	9.52777	2.19963	1.45059	4.7325	Low_risk	-1.57855
TCGA-CM-4744-01	1.66849	0	2.38893	7.68039	6.27229	6.14253	0.994435	10.6304	4.44853	0.280838	6.68532	Low_risk	-1.77778
TCGA-A6-5657-01	2.63562	0	2.9928	7.15729	6.62822	6.12043	1.71743	10.1851	3.19785	0.155231	7.46092	Low_risk	-1.55722
TCGA-CM-6169-01	1.08493	0	2.62632	6.0042	5.66067	5.42123	1.64741	9.95408	4.82721	0.592636	4.19958	High_risk	-1.4812
TCGA-CK-4948-01	12.3342	0	2.81824	7.6829	6.82649	7.13049	1.05395	10.4429	5.07925	5.34465	6.05388	Low_risk	-1.77369
TCGA-AA-A00Q-01	3.50137	0	3.33545	6.46482	5.25584	5.90112	2.20016	11.1038	2.80043	0.156008	5.49055	High_risk	-1.481
TCGA-AA-3950-01	2	0	3.26442	7.64766	6.46691	6.07873	1.31557	8.42691	3.73938	0.712376	5.27082	High_risk	-1.37413
TCGA-DM-A282-01	11.5973	0	3.28724	6.48292	5.3973	5.00193	1.7652	10.9921	5.75563	0.42975	4.90251	High_risk	-1.53553
TCGA-AA-3861-01	2.50411	0	2.61767	6.47844	5.44047	5.94182	1.7427	11.743	3.31788	1.9115	6.3278	Low_risk	-1.71229
TCGA-CA-5796-01	1.03288	0	0.844707	5.61141	5.03992	5.16602	2.81912	11.8092	4.61358	2.86718	7.13827	Low_risk	-1.77923
TCGA-CK-4950-01	7.12055	0	1.70408	6.82735	5.94793	5.45596	2.75884	11.3205	5.49283	6.94127	6.64062	Low_risk	-1.76868
TCGA-CM-6680-01	1.00274	0	2.96353	6.33878	5.5181	5.80898	1.62457	10.7706	4.10986	1.36121	6.22177	Low_risk	-1.55761
TCGA-AA-3833-01	1.32877	0	3.42413	6.80684	5.39935	6.15984	2.79577	10.8109	4.22226	6.05778	6.68237	High_risk	-1.45989
TCGA-AA-A029-01	4.33151	0	3.20987	7.01802	5.5827	6.62683	2.38209	12.0575	2.70478	1.86433	7.79295	Low_risk	-1.66199
TCGA-D5-5537-01	3.78356	1	3.5743	6.79198	5.36671	5.94894	1.33754	10.1166	3.80323	0.447632	4.66174	High_risk	-1.44261
TCGA-AA-3679-01	1.25205	0	3.44969	6.8326	5.62141	6.30899	3.40459	10.2063	3.96447	6.49518	7.30323	High_risk	-1.34127
TCGA-AA-3854-01	3.00274	0	3.00274	6.52025	5.57774	5.62891	2.53149	11.8445	2.45857	2.52067	7.09299	Low_risk	-1.6076
TCGA-AA-3549-01	1.75068	0	3.0471	6.88463	5.36788	6.26578	1.24543	10.0241	1.61065	3.09852	7.09383	High_risk	-1.50762
TCGA-G4-6309-01	7.12329	0	2.56616	8.13083	6.88292	6.7227	4.17212	11.171	6.04766	3.51963	6.36811	Low_risk	-1.63833
TCGA-NH-A8F8-01	1.4	1	3.71675	5.92715	5.5459	5.9965	1.2228	10.2615	2.80651	0.25181	5.97334	High_risk	-1.39979
TCGA-A6-6142-01	2.09041	0	2.09748	5.63758	5.40528	6.28456	0.741834	9.84923	1.68172	0.941782	3.75925	Low_risk	-1.56643
TCGA-F4-6570-01	0.515068	1	2.24692	6.65612	5.74536	5.91685	8.49689	10.8828	7.4052	0.0425043	6.34599	High_risk	-1.10194
TCGA-A6-A567-01	5.15342	1	2.41889	6.42227	5.83921	5.85456	0.842617	9.73895	3.58144	1.56203	2.604	Low_risk	-1.58607
TCGA-D5-6920-01	1.03288	0	2.92309	7.1224	6.34511	6.28701	1.98688	11.2005	5.25811	8.20288	7.47141	Low_risk	-1.72461
TCGA-AA-3939-01	1.08219	0	3.64936	7.47806	5.66801	5.948	2.46684	11.1978	2.92985	3.28583	4.59572	High_risk	-1.53071
TCGA-AU-3779-01	1.20822	0	2.78551	6.73529	6.09337	5.37135	1.54186	11.4574	3.02471	2.44964	4.46388	Low_risk	-1.71328
TCGA-AA-A00A-01	3.16986	0	3.09084	6.53594	5.48667	6.34965	7.39623	10.1219	3.12795	5.29524	6.62241	High_risk	-0.984427
TCGA-G4-6626-01	3.89589	1	3.67984	8.19893	6.81121	5.93642	2.45731	10.4108	1.12935	1.44938	6.34196	High_risk	-1.4931
TCGA-D5-6538-01	1.4274	0	2.68625	6.51464	5.92022	6.11404	2.1654	9.93173	3.54309	0.30229	6.19028	High_risk	-1.46029
TCGA-A6-2678-01	3.52329	0	2.71515	7.58355	6.77843	6.48958	1.79277	10.6321	1.60654	2.44951	4.15552	Low_risk	-1.68027
TCGA-AA-3713-01	1.5863	0	2.94755	6.63455	5.6765	6.42106	3.48335	11.1414	4.48633	5.89841	7.03807	High_risk	-1.50474
TCGA-AA-A01X-01	2.16712	0	2.95999	5.63151	5.37074	6.31387	2.15069	9.66243	3.61425	3.29885	3.96046	High_risk	-1.34416
TCGA-D5-6898-01	0.627397	0	1.98006	7.1831	6.6226	6.77764	1.19339	10.9368	4.00002	0.741143	6.79826	Low_risk	-1.84186
TCGA-D5-6533-01	2.12329	0	2.61046	7.05307	6.5125	5.61973	2.03027	9.9344	4.06823	4.67085	4.85932	Low_risk	-1.56658
TCGA-QG-A5YW-01	2.45479	0	2.77899	6.25718	6.63544	5.29849	1.51813	10.953	2.60824	4.13356	6.20565	Low_risk	-1.65387
TCGA-AA-3696-01	0.419178	1	4.00288	6.68051	5.69782	6.39288	3.31793	10.0546	4.06974	4.45843	5.6949	High_risk	-1.24834
TCGA-AA-3555-01	2.49589	0	3.14034	7.49316	6.83903	6.13328	1.34261	10.9846	1.87003	0.631244	6.17306	Low_risk	-1.69288
TCGA-AZ-4614-01	0.471233	1	3.4211	6.48464	6.06067	6.36384	3.45879	11.4059	3.37416	2.0246	6.2412	High_risk	-1.45576
TCGA-AA-3866-01	1.41918	0	2.72607	7.82755	6.41818	6.56385	0.960586	10.3213	2.40572	1.45344	4.85592	Low_risk	-1.71348
TCGA-AZ-6608-01	0.161644	1	2.53421	7.07562	6.04611	6.16419	2.33497	11.1688	0.580821	0.500496	3.25282	Low_risk	-1.63375
TCGA-SS-A7HO-01	5.01096	0	3.98139	7.77673	6.30346	6.92937	1.76226	8.61946	4.53692	2.08967	2.9325	High_risk	-1.30157
TCGA-DM-A28G-01	5.06575	1	2.95183	5.79164	5.06092	5.67788	1.34869	10.8405	3.94444	0.54409	4.64282	High_risk	-1.53337
TCGA-CA-5254-01	1.05753	0	3.0311	6.83569	7.98875	6.00528	1.10125	10.9546	5.76168	0	7.68846	Low_risk	-1.76386
TCGA-AA-A01Q-01	0.0849315	0	3.10693	5.44912	4.30087	5.90028	4.3857	10.6138	2.33571	0.245982	5.701	High_risk	-1.14965
TCGA-AA-3514-01	0.0849315	0	2.76933	6.79301	5.26509	7.63223	2.00061	11.9302	8.49143	1.4621	7.19215	Low_risk	-1.77042
TCGA-AA-3977-01	2.08493	0	3.49025	8.04467	6.66875	6.59297	2.55009	10.7958	2.54866	4.74622	6.40515	Low_risk	-1.58286
TCGA-G4-6297-01	6.86575	0	3.08056	6.0176	5.88848	5.46143	1.8781	10.794	3.58452	5.13913	6.22926	High_risk	-1.53596
TCGA-D5-5538-01	4.55068	1	2.30118	6.9101	6.57474	5.5758	3.89566	10.3719	3.20614	0.0976108	5.85491	High_risk	-1.44927
TCGA-AA-3980-01	2.25205	0	2.80795	7.02256	5.92884	6.13109	1.92117	9.42775	4.43702	6.35481	5.98598	High_risk	-1.4816
TCGA-AY-4071-01	0.0794521	1	2.65494	5.95528	4.45992	5.7482	3.23363	11.0207	4.98577	5.23993	6.78586	High_risk	-1.4456
TCGA-F4-6463-01	2.97808	0	2.66816	6.87846	6.37485	5.95549	1.07464	11.3278	4.17245	0.6107	5.19709	Low_risk	-1.77949
TCGA-AA-3710-01	2.24932	0	3.59212	7.67895	6.48268	6.17952	1.81201	10.3924	3.83195	4.45534	6.25328	Low_risk	-1.56055
TCGA-AA-3556-01	1.91781	0	2.52334	7.1692	7.28082	5.90571	1.34369	11.2017	4.82086	5.54932	6.52679	Low_risk	-1.84965
TCGA-AA-A01R-01	2.91781	0	3.39763	7.32628	5.70339	6.95542	3.29263	10.2533	5.6578	0	6.20754	High_risk	-1.37987
TCGA-AA-3697-01	7.08767	0	3.32733	6.93758	6.35618	6.48911	2.015	10.409	4.98252	6.60779	6.56707	Low_risk	-1.55597
TCGA-DM-A1HB-01	11.3041	0	2.22089	7.51812	6.47991	5.64293	4.02205	11.2869	3.39115	0	6.75789	Low_risk	-1.5931
TCGA-AA-3681-01	0.49863	0	4.52638	7.64911	5.78306	6.1149	1.91571	11.356	3.35741	5.6561	7.88937	High_risk	-1.52449
TCGA-AA-3531-01	2.83562	0	4.17209	7.23694	6.12567	7.1195	2.44758	11.4706	4.85606	3.55773	5.68697	High_risk	-1.54241
TCGA-AA-3845-01	0	1	3.07512	7.7219	6.20946	5.09826	1.18568	9.67936	4.53956	6.58449	4.33653	Low_risk	-1.58854
TCGA-AA-3660-01	6.50685	0	3.04625	7.72325	6.75408	5.80364	2.42046	10.4023	6.11789	6.36233	6.71739	Low_risk	-1.61599
TCGA-AA-A02R-01	1.83562	1	3.80352	7.60768	6.37885	7.37348	1.64062	7.09207	2.43122	0.648557	6.2062	High_risk	-1.11289
TCGA-AA-3532-01	2.41644	0	2.47389	7.38309	6.09496	6.5543	2.2509	10.4076	5.48836	6.00853	5.3577	Low_risk	-1.65638
TCGA-AZ-4313-01	6.32877	0	2.08359	7.67952	6.02391	6.49856	1.65883	11.4016	2.1515	0.775346	6.13138	Low_risk	-1.82853
TCGA-G4-6588-01	2.18082	0	3.10064	7.80073	6.71879	6.53998	2.10675	10.5888	4.57705	0.748805	5.7504	Low_risk	-1.6249
TCGA-G4-6322-01	2.16986	0	2.85382	7.06755	6.5564	5.54921	1.6988	11.919	2.67868	0	6.27922	Low_risk	-1.76966
TCGA-AA-3875-01	1.50411	0	3.95732	7.55511	5.88023	5.98494	2.18837	11.1052	4.59124	6.26648	4.40648	Low_risk	-1.55478
TCGA-D5-6531-01	1.47945	0	2.47254	7.06128	6.34511	5.98367	1.30024	9.62091	2.02797	0	7.64446	Low_risk	-1.55609
TCGA-AA-3489-01	0.586301	1	2.47028	6.43183	5.65321	5.51966	0.93463	9.15987	1.64284	0.733615	3.55785	High_risk	-1.46406
TCGA-AA-3949-01	2.16712	0	3.17172	7.36434	5.81213	5.80866	0	10.3963	4.20835	0.931834	4.61888	Low_risk	-1.70246
TCGA-AA-3662-01	0.50411	0	3.96274	6.8056	5.40749	5.94203	2.57509	9.70327	5.34625	5.2183	5.31162	High_risk	-1.28053
TCGA-AA-3850-01	0	1	3.2423	6.72055	5.667	5.57435	2.28741	11.2753	4.95712	6.14912	5.78285	Low_risk	-1.59147
TCGA-AU-6004-01	2.25753	0	2.75856	7.16397	6.21065	6.16705	1.77395	10.2898	4.70596	0.286408	6.89707	Low_risk	-1.59129
TCGA-CM-4747-01	2.08493	0	2.80647	5.17799	5.09021	6.13742	3.5471	11.5497	3.45005	2.06778	5.56261	High_risk	-1.42025
TCGA-AA-3494-01	0.0849315	0	2.86586	7.05147	6.34638	6.64644	0.929185	10.0296	4.10903	4.84186	6.20138	Low_risk	-1.65111
TCGA-AZ-4615-01	2.74521	0	2.65049	7.357	6.11996	5.71523	3.4588	9.90911	3.07777	0.0735461	6.82931	High_risk	-1.3935
TCGA-AA-A010-01	2.91507	0	3.47711	7.03003	5.95014	6.09477	1.77568	10.0471	5.63943	4.30797	6.39551	High_risk	-1.48771
TCGA-AA-3819-01	2.08493	0	3.68134	7.22712	5.86121	6.12854	2.12984	11.0402	5.16566	5.92049	5.21753	Low_risk	-1.5696
TCGA-AA-3989-01	0.663014	1	3.74106	6.52371	5.15147	6.11754	0.952184	11.6304	2.54787	3.08057	6.42368	Low_risk	-1.62402
TCGA-AA-A01C-01	1.25205	0	3.74024	7.02372	5.60083	6.60142	2.26352	10.8312	2.38018	1.49119	5.25188	High_risk	-1.45473
TCGA-A6-6138-01	1.87671	0	1.52812	6.6971	6.11093	5.79555	1.78144	9.56948	4.57591	1.70412	5.6834	Low_risk	-1.62409
TCGA-AA-3814-01	0	0	3.1689	6.57469	5.67508	5.86636	1.86445	10.83	4.22152	5.73399	5.33356	Low_risk	-1.56993
TCGA-A6-6652-01	2.05753	0	3.25585	6.21112	6.38046	6.50942	1.73461	8.75578	0.237441	0.967242	1.72308	High_risk	-1.27144
TCGA-QG-A5Z1-01	0.70137	1	3.01058	5.23694	5.2363	5.55448	1.9375	10.7662	2.29699	0.179638	5.04088	High_risk	-1.42113
TCGA-AA-3831-01	1.49863	0	3.62823	7.20874	6.00699	6.40267	2.40904	12.204	5.72883	3.64195	7.03225	Low_risk	-1.69286
TCGA-WS-AB45-01	5.83562	0	1.58347	6.47904	6.19489	4.664	0.824646	9.38901	3.35644	1.59484	4.83789	Low_risk	-1.64456
TCGA-A6-5659-01	2.53699	0	2.54775	5.91077	5.41599	5.72536	0.817569	9.65926	1.18011	0.0626283	6.02782	High_risk	-1.47738
TCGA-CK-5912-01	4.09041	1	2.06008	6.08382	5.45798	6.71785	0.600365	9.4961	3.53434	2.86184	2.06443	Low_risk	-1.60488
TCGA-D5-6537-01	0.4	1	2.23033	7.6894	7.68659	6.47895	0.910502	11.2051	1.99809	1.77315	4.77948	Low_risk	-1.93294
TCGA-DM-A0XF-01	3.18356	1	3.0718	6.75732	5.06437	6.93753	2.64356	10.8466	5.30476	0.174023	5.26852	High_risk	-1.48771
TCGA-CM-6171-01	1.16986	0	2.70916	6.88949	6.12954	5.58368	2.87961	10.8052	3.73474	1.24574	5.97875	High_risk	-1.53408
TCGA-AA-3870-01	2.49863	0	1.56915	6.62873	5.66394	6.77036	1.57517	10.0189	3.14916	4.2818	6.67572	Low_risk	-1.68482
TCGA-AA-A00E-01	2.50137	0	3.19186	7.23156	6.29686	5.68656	2.63877	10.1493	2.58626	5.494	6.50942	High_risk	-1.46021
TCGA-CM-6161-01	1.25205	0	2.88729	7.66412	6.17223	6.03676	1.68037	10.8979	5.48255	2.17053	2.62649	Low_risk	-1.7086
TCGA-AA-A02J-01	0.419178	1	3.83293	7.36181	6.36988	6.75142	2.3946	10.4946	4.18399	5.28477	7.6335	High_risk	-1.48346
TCGA-D5-6539-01	1.0411	0	1.97288	6.79008	5.89136	5.71121	3.35657	11.8293	5.29479	7.38692	7.59454	Low_risk	-1.74469
TCGA-DM-A1DB-01	3.69315	1	4.56225	6.81087	6.54724	5.56894	3.13491	10.8196	7.46607	0.381062	6.90138	High_risk	-1.3281
TCGA-AA-A01F-01	2.66849	0	3.14833	6.16615	4.70476	6.03069	4.88349	10.0361	3.43086	1.80285	6.26099	High_risk	-1.10963
TCGA-AZ-6598-01	4.11781	1	1.64745	7.19773	5.79304	5.26512	1.72535	10.2583	1.96658	0.0458623	4.49163	Low_risk	-1.67494
TCGA-AA-3858-01	2.58904	0	3.35945	6.64499	6.05828	6.66193	1.9177	10.6233	4.34947	5.33011	3.57645	High_risk	-1.549
TCGA-CM-4743-01	1.92055	0	2.26538	7.13955	5.73132	4.49703	0.809579	8.28392	6.6683	1.82379	4.52073	High_risk	-1.47343
TCGA-AA-3554-01	1.49589	0	2.59832	7.16164	6.25144	6.69892	4.14419	10.672	4.39871	4.27761	8.7993	High_risk	-1.47764
TCGA-A6-2682-01	1.16164	1	3.00016	7.00256	5.72262	5.94353	3.10623	10.9347	4.87717	4.25785	7.1605	High_risk	-1.51606
TCGA-AA-3872-01	0	0	2.49736	6.59904	5.41403	6.12801	3.04595	10.2374	2.86987	1.89426	6.53772	High_risk	-1.42955
TCGA-AA-3678-01	3.91781	0	3.79505	6.21276	6.08071	6.21235	1.88659	10.6944	6.58893	5.90535	6.24504	High_risk	-1.49778
TCGA-AA-3672-01	0.0767123	0	2.48586	6.74545	5.69391	7.04008	3.22782	9.83198	8.32654	4.64934	7.22587	High_risk	-1.4638
TCGA-D5-6923-01	1.03562	0	3.3647	7.46678	6.90512	7.11231	2.07635	9.5108	3.92527	0.586981	6.55838	High_risk	-1.45094
TCGA-AA-3812-01	2.92055	0	2.53762	5.3384	5.24889	6.03409	3.01185	11.505	7.28726	7.472	6.38069	Low_risk	-1.57755
TCGA-AA-3680-01	0.917808	1	2.64429	5.77785	4.89321	5.54444	2.50528	11.5744	3.91579	1.85858	5.75493	Low_risk	-1.55599
TCGA-NH-A6GC-01	1.06575	0	2.97032	5.52808	4.17283	4.8838	3.15337	10.7615	1.89933	0	6.02407	High_risk	-1.27277
TCGA-A6-4105-01	1.21096	1	3.32379	6.90767	7.14668	5.88657	1.82888	10.856	2.95559	5.10541	6.19992	Low_risk	-1.62583
TCGA-AA-3867-01	2.00274	0	2.92429	5.92652	5.48964	6.45965	1.81594	10.7674	5.34269	6.54767	5.09695	Low_risk	-1.57395
TCGA-AA-3970-01	3.00274	0	3.69622	7.09733	5.88848	5.8846	2.22089	10.801	5.67338	5.83205	4.60523	High_risk	-1.52519
TCGA-5M-AAT6-01	0.794521	1	2.84095	6.99359	6.01467	6.57587	1.69613	8.64437	2.89427	0	5.36991	High_risk	-1.35542
TCGA-D5-7000-01	0.854795	0	2.79433	7.59223	6.59729	6.33538	1.96325	10.8911	1.77509	0.264717	7.64825	Low_risk	-1.66153
TCGA-AA-A01K-01	2.58356	0	3.72776	6.81139	5.59847	6.05041	0.977097	10.6691	5.60129	2.08059	6.72011	Low_risk	-1.56097
TCGA-AA-3955-01	1.74795	0	3.38529	8.48595	6.32488	6.70939	1.71097	10.903	3.81787	4.53654	5.30825	Low_risk	-1.70657
TCGA-AA-3860-01	2.58904	0	3.63857	6.36212	5.99359	5.60003	2.71348	11.3634	3.81616	5.41042	4.47342	High_risk	-1.4969
TCGA-G4-6293-01	11.0986	0	2.75514	6.11495	5.54072	5.69301	1.41246	10.8874	4.12448	1.26352	6.05482	Low_risk	-1.6023
TCGA-AD-A5EK-01	1.36986	0	3.69375	7.45439	5.99046	6.05471	2.27754	9.51008	1.87228	0.177599	5.97143	High_risk	-1.31695
TCGA-AA-3842-01	3.08493	0	2.90026	7.74043	6.02674	6.74282	0.913493	11.3744	6.77008	1.94167	6.80965	Low_risk	-1.84667
TCGA-CM-6166-01	1.83288	0	2.62996	7.2047	6.81793	5.70977	0.854315	10.6214	2.16224	0.424492	3.74198	Low_risk	-1.73402
TCGA-D5-6540-01	1.34521	0	2.89052	7.58684	6.58458	5.58126	1.68271	9.82535	3.50507	0.493237	7.0414	High_risk	-1.54939
TCGA-F4-6809-01	1.10411	1	2.50498	6.70774	4.72787	5.71966	2.85198	10.1704	3.66941	2.35344	6.22986	High_risk	-1.41834
TCGA-NH-A50T-01	1.51507	0	3.92708	7.80654	6.71617	6.84092	1.76884	10.1453	2.77524	2.12598	6.9158	High_risk	-1.49478
TCGA-AA-3517-01	3.24932	0	4.11855	6.73158	5.238	5.76218	1.84205	10.3562	5.13133	4.3761	5.13764	High_risk	-1.38577
TCGA-AD-6888-01	1.29315	1	2.67068	7.00007	6.37072	6.05509	3.38227	10.3755	3.94501	7.06964	6.91762	High_risk	-1.50245
TCGA-D5-5540-01	4.67397	0	3.67737	8.62912	6.71663	5.63275	1.20314	9.48405	1.1147	0	0.993855	High_risk	-1.50344
TCGA-CK-4947-01	1.46301	0	2.4147	7.01756	6.12479	6.20601	1.34761	10.9576	6.94897	2.36491	5.84722	Low_risk	-1.77622
TCGA-A6-6140-01	2.01096	0	2.62218	7.23631	6.27278	6.43827	2.52529	10.9353	4.58647	6.41932	6.69052	Low_risk	-1.66994
TCGA-CK-5915-01	0	0	2.6291	7.77983	6.82031	6.30601	1.03436	11.3641	1.15484	1.20546	4.35301	Low_risk	-1.84695
TCGA-D5-6926-01	0.753425	0	3.35633	5.97682	5.94277	6.06522	1.07635	9.91155	2.74936	0.358059	4.73997	High_risk	-1.4364
TCGA-AA-3685-01	3.08767	0	2.76143	7.68502	5.84816	5.99043	1.7586	10.5854	5.22811	6.5327	3.47537	Low_risk	-1.689
TCGA-QG-A5Z2-01	2.60822	0	3.60195	6.77684	5.99927	4.99172	1.6992	10.3585	4.21434	2.72295	5.68482	High_risk	-1.46809
TCGA-AA-3663-01	0.580822	0	3.02159	7.42611	6.52192	6.07686	4.19886	11.4817	2.90178	0.480989	5.05168	High_risk	-1.50703
TCGA-AA-A01Z-01	3.08493	0	3.49706	6.84363	7.45439	7.16307	2.96894	10.6759	0.776357	2.87251	7.34546	High_risk	-1.47385
TCGA-T9-A92H-01	0.991781	0	2.69187	7.23571	6.405	6.42036	1.49129	10.5474	2.40752	5.4205	5.34113	Low_risk	-1.68622
TCGA-AA-A03J-01	3.4137	0	3.1334	6.5927	5.04589	6.85044	4.13922	10.8498	5.39546	6.39947	6.12483	High_risk	-1.37596
TCGA-A6-5662-01	1.96712	0	2.46563	6.43544	5.3923	5.92692	1.90416	10.1892	1.81918	0.416948	3.49415	High_risk	-1.49998
TCGA-CM-4748-01	2.16986	0	2.11839	7.23622	5.8935	6.20501	3.80204	10.6565	2.61266	3.15892	6.98078	High_risk	-1.52522
TCGA-CA-6718-01	0.838356	1	2.59682	8.30659	7.43523	6.29193	1.2969	7.64406	4.83171	0.0882773	4.40383	High_risk	-1.45137
TCGA-A6-6651-01	1.8137	0	1.72028	6.16643	5.79388	5.37534	0.817296	9.7173	5.24909	0.682753	4.67382	Low_risk	-1.65431
TCGA-AA-3492-01	0.252055	1	3.03742	8.26384	7.09694	6.79628	5.05355	12.2682	4.42617	2.93627	6.40661	Low_risk	-1.63847
TCGA-5M-AAT4-01	0.134247	1	3.44248	7.03304	6.44581	6.46172	1.77804	10.1362	1.39999	0.0792928	8.02771	High_risk	-1.46307
TCGA-AA-A00R-01	0.0821918	0	2.65558	7.35179	6.34722	6.72981	1.37868	8.07476	5.4944	0.08882	5.11275	High_risk	-1.39758
TCGA-AD-6889-01	6.93699	1	3.60532	6.88232	5.82848	5.68385	1.72631	10.0414	3.22301	0.384713	5.85631	High_risk	-1.4102
TCGA-CM-5344-01	1.83562	0	3.02529	6.36631	6.32976	5.00042	1.5433	11.7174	3.58712	4.50183	4.55025	Low_risk	-1.71794
TCGA-CM-5860-01	2.66849	0	2.1147	7.66854	6.30894	6.49602	1.77438	11.7598	3.4652	3.37915	5.9433	Low_risk	-1.89925
TCGA-G4-6294-01	2.35068	1	3.16988	6.82464	5.70313	5.5556	1.45512	9.50973	1.86473	0.280006	3.87574	High_risk	-1.40032
TCGA-AA-3976-01	2.16712	0	3.81166	7.95989	5.68321	6.782	2.90933	10.575	5.21051	6.26957	5.2221	High_risk	-1.4736
TCGA-CM-6674-01	1.07945	0	1.42535	7.09371	6.28713	5.9967	2.3564	11.2137	4.90846	0	4.57846	Low_risk	-1.81613
TCGA-D5-6927-01	0.786301	0	3.65905	7.55533	6.59562	6.73417	2.84609	9.94381	3.23718	3.68288	6.64646	High_risk	-1.40013
TCGA-AA-3984-01	0	0	4.24426	8.02349	6.65225	6.32401	2.1689	10.0561	3.32262	3.7696	3.86119	High_risk	-1.43133
TCGA-D5-5539-01	1.63288	0	2.31693	6.03778	6.22338	6.05138	1.97937	11.274	3.29771	3.62494	5.73532	Low_risk	-1.69186
TCGA-AA-3982-01	2.25205	0	2.57848	7.1036	5.92103	6.29682	1.86655	10.4991	5.05351	6.63538	6.36082	Low_risk	-1.66035
TCGA-AD-6548-01	1.78082	0	2.98012	8.03973	6.8735	6.37898	2.19626	10.5114	4.2522	5.00589	5.51135	Low_risk	-1.66501
TCGA-AA-3851-01	2.75616	0	3.07394	6.71218	6.04498	5.98435	2.26921	12.1559	6.06354	5.57077	6.15298	Low_risk	-1.75014
TCGA-AY-6197-01	1.7863	0	3.62128	6.9547	6.41897	6.64133	3.17351	10.891	6.75744	1.55601	8.26544	High_risk	-1.46505
TCGA-G4-6299-01	6.2137	0	3.13424	6.689	6.02745	6.13113	2.18307	8.63031	3.76924	0.0942361	5.98897	High_risk	-1.25934
TCGA-AA-3552-01	1.08493	1	2.98988	5.96698	5.2684	6.09219	2.13462	10.3768	4.02552	7.09314	6.23242	High_risk	-1.46732
TCGA-AZ-4323-01	0.117808	1	3.50875	6.60528	6.19786	5.02288	1.52912	9.42937	4.61329	4.06399	6.25962	High_risk	-1.39026
TCGA-F4-6805-01	2.86849	0	1.95207	7.51942	6.60516	6.51995	1.05852	10.4545	4.4155	4.8594	5.6441	Low_risk	-1.84405
TCGA-CM-5864-01	1.25205	0	2.5358	7.12167	6.02276	5.82137	2.34846	9.77057	2.30083	1.2345	3.20297	High_risk	-1.47664
TCGA-G4-6317-01	3	0	2.17268	6.83977	5.79697	6.44202	1.25526	10.2446	4.17305	2.10578	3.04897	Low_risk	-1.6808
TCGA-DM-A28E-01	9.99452	0	3.33571	6.70868	5.97252	6.12806	2.38822	10.8852	1.49303	0.227125	2.85997	High_risk	-1.47809
TCGA-D5-6929-01	1.11781	0	2.59734	6.39659	6.42106	6.1276	1.81348	10.6702	3.90826	2.61113	5.08536	Low_risk	-1.62823
TCGA-AA-3979-01	2	0	2.75683	8.44324	6.59047	6.80622	2.15682	10.1485	4.19037	3.27092	6.81343	Low_risk	-1.6546
TCGA-AY-A69D-01	1.48767	0	3.55953	7.65766	6.50505	5.54717	2.6695	11.7319	2.5603	2.86881	5.07627	Low_risk	-1.62524
TCGA-A6-2685-01	3.10411	0	2.84651	6.64278	4.68129	6.67137	6.26837	10.7927	6.36375	5.19652	6.53521	High_risk	-1.20043
TCGA-D5-6534-01	3.60548	0	1.90674	5.2928	4.66625	4.48216	1.89146	9.75633	3.91905	4.50631	5.26589	High_risk	-1.43999
TCGA-DM-A1DA-01	0.624658	1	2.98087	7.23453	5.83395	6.11058	1.61075	9.70452	2.07834	0.248778	6.56466	High_risk	-1.46951
TCGA-AA-A01T-01	2.75342	0	2.45518	6.07697	4.29514	6.47582	4.19941	10.664	3.86358	5.05904	8.23992	High_risk	-1.33723
TCGA-AA-3675-01	3.92055	0	2.82295	7.06887	6.29488	6.48373	1.705	10.6312	1.74996	2.43632	4.36522	Low_risk	-1.62429
TCGA-G4-6304-01	4.46849	0	3.37914	6.96906	5.40948	6.86041	2.27557	10.5098	1.83629	0.305912	3.29222	High_risk	-1.43972
TCGA-AA-3561-01	1.16164	0	3.55934	8.30399	6.35981	5.60214	1.74722	10.4486	5.09014	2.714	2.13898	Low_risk	-1.60535
TCGA-AD-6965-01	2.20548	0	3.3455	7.90554	6.93349	6.56321	2.20889	11.0605	4.08364	2.03171	7.33063	Low_risk	-1.66211
